# Supplementary material for: Application of solubility parameters in ad-sorbitol-based organogel in binary organic mixtures
Source: Royal Society of Chemistry journal article supplement (doi:10.1039/c3sm52676c), 2013-11-26
Supplement: c3sm52676c.pdf [file c3sm52676c.pdf]

Supporting information for

**Application of solubility parameter in a D-Sorbitol-Based  
organogel in binary organic mixtures**

Ciqing Tong, Kaiqi Fan, Libo Niu, Jingjing Li, Xidong Guan, Naimin Tao, Huahua Shen and  
Jian Song\*

School of Chemical Engineering and Technology, Tianjin University, Tianjin, 300072, P. R.

China.

**Table S1 Calculated Hansen solubility parameters and gelation behaviour for DCBS in binary organic mixed solvents <sup>a</sup>.**

| Solvents                               | $\delta_d$ (MPa <sup>1/2</sup> ) | $\delta_p$ (MPa <sup>1/2</sup> ) | $\delta_h$<br>(MPa <sup>1/2</sup> ) | Gelation<br>behaviour |
|----------------------------------------|----------------------------------|----------------------------------|-------------------------------------|-----------------------|
| Ethanol:<br>Methylcyclohexane<br>(v/v) |                                  |                                  |                                     |                       |
| 90:10                                  | 15.82                            | 7.92                             | 17.56                               | S                     |
| 80:20                                  | 15.84                            | 7.04                             | 15.72                               | S                     |
| 70:30                                  | 15.86                            | 6.16                             | 13.88                               | PG                    |
| 60:40                                  | 15.88                            | 5.28                             | 12.04                               | PG                    |
| 50:50                                  | 15.9                             | 4.4                              | 10.2                                | G                     |
| 40:60                                  | 15.92                            | 3.52                             | 8.36                                | G                     |
| 30:70                                  | 15.94                            | 2.64                             | 6.52                                | G                     |
| 20:80                                  | 15.96                            | 1.76                             | 4.68                                | G                     |
| 10:90                                  | 15.98                            | 0.88                             | 2.84                                | P                     |
| 05:95                                  | 15.99                            | 0.44                             | 1.92                                | P                     |
| Ethanol:n-Octane<br>(v/v)              |                                  |                                  |                                     |                       |
| 90:10                                  | 15.77                            | 7.92                             | 17.46                               | S                     |
| 80:20                                  | 15.74                            | 7.04                             | 15.52                               | S                     |
| 70:30                                  | 15.71                            | 6.16                             | 13.58                               | PG                    |

|                              |       |      |       |    |
|------------------------------|-------|------|-------|----|
| 60:40                        | 15.68 | 5.28 | 11.64 | PG |
| 50:50                        | 15.65 | 4.4  | 9.7   | G  |
| 40:60                        | 15.62 | 3.52 | 7.76  | G  |
| 30:70                        | 15.59 | 2.64 | 5.82  | G  |
| 20:80                        | 15.56 | 1.76 | 3.88  | G  |
| 10:90                        | 15.53 | 0.88 | 1.94  | P  |
| 05:95                        | 15.52 | 0.44 | 0.97  | P  |
| Ethanol:n-Hexane<br>(v/v)    |       |      |       |    |
| 90:10                        | 15.71 | 7.92 | 17.46 | S  |
| 80:20                        | 15.62 | 7.04 | 15.52 | S  |
| 70:30                        | 15.53 | 6.16 | 13.58 | PG |
| 60:40                        | 15.44 | 5.28 | 11.64 | G  |
| 50:50                        | 15.35 | 4.4  | 9.7   | G  |
| 40:60                        | 15.26 | 3.52 | 7.76  | G  |
| 30:70                        | 15.17 | 2.64 | 5.82  | G  |
| 20:80                        | 15.08 | 1.76 | 3.88  | P  |
| 10:90                        | 14.99 | 0.88 | 1.94  | P  |
| 05:95                        | 14.95 | 0.44 | 0.97  | P  |
| Ethanol:Cyclohexane<br>(v/v) |       |      |       |    |
| 90:10                        | 15.9  | 7.92 | 17.48 | S  |

|                            |       |      |       |    |
|----------------------------|-------|------|-------|----|
| 80:20                      | 16    | 7.04 | 15.56 | S  |
| 70:30                      | 16.1  | 6.16 | 13.64 | S  |
| 60:40                      | 16.2  | 5.28 | 11.72 | PG |
| 50:50                      | 16.3  | 4.4  | 9.8   | G  |
| 40:60                      | 16.4  | 3.52 | 7.88  | G  |
| 30:70                      | 16.5  | 2.64 | 5.96  | G  |
| 20:80                      | 16.6  | 1.76 | 4.04  | G  |
| 10:90                      | 16.7  | 0.88 | 2.12  | P  |
| 05:95                      | 16.75 | 0.44 | 1.16  | P  |
| Ethanol:n-Octanol<br>(v/v) |       |      |       |    |
| 90:10                      | 15.92 | 8.25 | 18.65 | S  |
| 80:20                      | 16.04 | 7.7  | 17.9  | S  |
| 70:30                      | 16.16 | 7.15 | 17.15 | S  |
| 60:40                      | 16.28 | 6.6  | 16.4  | S  |
| 50:50                      | 16.4  | 6.05 | 15.65 | S  |
| 40:60                      | 16.52 | 5.5  | 14.9  | G  |
| 30:70                      | 16.64 | 4.95 | 14.15 | G  |
| 20:80                      | 16.76 | 4.4  | 13.4  | G  |
| 10:90                      | 16.88 | 3.85 | 12.65 | G  |
| Ethanol:Toluene (v/v)      |       |      |       |    |
| 90:10                      | 16.02 | 8.06 | 17.66 | S  |

|                                                                                               |       |      |       |    |
|-----------------------------------------------------------------------------------------------|-------|------|-------|----|
| 80:20                                                                                         | 16.24 | 7.32 | 15.92 | S  |
| 70:30                                                                                         | 16.46 | 6.58 | 14.18 | S  |
| 60:40                                                                                         | 16.68 | 5.84 | 12.44 | PG |
| 50:50                                                                                         | 16.9  | 5.1  | 10.7  | G  |
| 40:60                                                                                         | 17.12 | 4.36 | 8.96  | G  |
| 30:70                                                                                         | 17.34 | 3.62 | 7.22  | G  |
| 20:80                                                                                         | 17.56 | 2.88 | 5.48  | G  |
| 10:90                                                                                         | 17.78 | 2.14 | 3.74  | G  |
| Ethanol:Ethyl acetate<br>(v/v)                                                                |       |      |       |    |
| 90:10                                                                                         | 15.8  | 8.45 | 18.18 | S  |
| 70:30                                                                                         | 15.8  | 8.1  | 16.96 | S  |
| 60:40                                                                                         | 15.8  | 7.75 | 15.74 | S  |
| 50:50                                                                                         | 15.8  | 7.4  | 14.52 | PG |
| 30:70                                                                                         | 15.8  | 7.05 | 13.3  | G  |
| 20:80                                                                                         | 15.8  | 6.7  | 12.08 | G  |
| 10:90                                                                                         | 15.8  | 6.35 | 10.86 | G  |
| <sup>a</sup> Concentration: 2% (w/v). S: solution, PG: partial gel, G: gel, P: precipitation. |       |      |       |    |

**Table S2 Summary of group additivity values for DCBS.**

|                                                 | Fedors Method <sup>a</sup> |                                                                        |                                                                             |                                               |      |                                          |                            |
|-------------------------------------------------|----------------------------|------------------------------------------------------------------------|-----------------------------------------------------------------------------|-----------------------------------------------|------|------------------------------------------|----------------------------|
| Groups                                          | -CH <sub>2</sub>           | -CH<                                                                   | -Cl<br>(Halogen<br>attached<br>to carbon<br>atom<br>with<br>double<br>bond) | -OH<br>(disubstituted<br>or on adjacent<br>C) | -O-  | Ring<br>closure<br>5 or<br>more<br>atoms | Phenyl<br>(trisubstituted) |
| Occurrences,<br>N <sub>i</sub>                  | 2                          | 5                                                                      | 2                                                                           | 4                                             | 2    | 1                                        | 1                          |
| E <sub>i</sub> (J/mol)                          | 4940                       | 3430                                                                   | 9240                                                                        | 21850                                         | 3350 | 1050                                     | 31940                      |
| V <sub>i</sub> (cm <sup>3</sup> /mol)           | 16.1                       | -1.0                                                                   | 4.0                                                                         | 13.0                                          | 3.8  | 16.0                                     | 33.4                       |
| Sum                                             |                            | $E_{\text{coh}} = \sum E_i N_i = 172600$<br>$V = \sum V_i N_i = 144.2$ |                                                                             |                                               |      |                                          |                            |
| $\delta$ (J <sup>1/2</sup> /cm <sup>3/2</sup> ) |                            | $\delta = (E_{\text{coh}}/V)^{1/2} = 34.60$                            |                                                                             |                                               |      |                                          |                            |

<sup>a</sup>All this data was taken from Van Krevelen, D. W. H. P. J. Properties of Polymers.

Elsevier Scientific Publishing: New York, 1976.

**Table S3 Calculated Flory-Huggins parameter ( $\chi$ ) of DCBS in ethanol-methylcyclohexane mixtures for an example.**

|                                                                                                                                                                                                                                                                                                                                                                                                                                                                                                                                                                                                  |
|--------------------------------------------------------------------------------------------------------------------------------------------------------------------------------------------------------------------------------------------------------------------------------------------------------------------------------------------------------------------------------------------------------------------------------------------------------------------------------------------------------------------------------------------------------------------------------------------------|
| <p>Example: Estimation of the Flory-Huggins parameter (<math>\chi</math>) of DCBS gelator in 50% methylcyclohexane volume fraction in ethanol-methylcyclohexane mixtures.</p>                                                                                                                                                                                                                                                                                                                                                                                                                    |
| <p>Solution:</p> <p>The Hildebrand solubility parameter</p> $\delta = \delta_{\text{C}_2\text{H}_5\text{OH}} * \text{vol fraction} + \delta_{\text{C}_7\text{H}_{14}} * (1 - \text{vol fraction})$ $= 26 * 0.5 + 16 * 0.5 = 21.0 \text{ J}^{1/2}/\text{cm}^{3/2}$ <p>The molar volume</p> $V = V_{\text{C}_2\text{H}_5\text{OH}} * \text{vol fraction} + V_{\text{C}_7\text{H}_{14}} * (1 - \text{vol fraction})$ $= 58.5 * 0.5 + 128.3 * 0.5 = 80.4 \text{ cm}^3/\text{mol}$ <p>According to eq</p> $\chi = V_1 (\delta_2 - \delta_1)^2 / RT = 80.4 * (34.60 - 21.0)^2 / 8.314 / 298.15 = 6.00$ |

**Table S4 Calculated solubility parameters ( $\delta$ ), molar volume (V) and Flory-Huggins parameter ( $\chi$ ) for DCBS in various solvents<sup>a</sup>.**

| Solvents          | $\delta$<br>( $\text{J}^{1/2}/\text{cm}^{3/2}$ ) | V ( $\text{cm}^3/\text{mol}$ ) | $\chi$ | Gelation<br>behaviour |
|-------------------|--------------------------------------------------|--------------------------------|--------|-----------------------|
| DCBS              | 34.6                                             |                                |        |                       |
| Methylcyclohexane | 16.0                                             | 128.3                          | 17.91  | P                     |
| Cyclohexane       | 16.8                                             | 108.7                          | 13.89  | P                     |
| n-Hexane          | 14.9                                             | 131.6                          | 20.6   | P                     |

|                                        |       |        |       |    |
|----------------------------------------|-------|--------|-------|----|
| n-Octane                               | 15.5  | 163.5  | 24.06 | P  |
| Carbon tetrachloride                   | 17.6  | 97.1   | 11.32 | P  |
| Toluene                                | 18.2  | 106.8  | 11.59 | G  |
| n-Octanol                              | 21.1  | 157.7  | 11.59 | G  |
| Ethyl acetate                          | 18.6  | 98.5   | 10.17 | G  |
| n-Butanol                              | 23.3  | 91.5   | 4.71  | G  |
| Ethanol                                | 26.0  | 58.5   | 1.75  | S  |
| Ethanol:<br>Methylcyclohexane<br>(v/v) |       |        |       |    |
| 90:10                                  | 25    | 61.87  | 2.30  | S  |
| 80:20                                  | 24    | 65.64  | 2.98  | S  |
| 70:30                                  | 23    | 69.91  | 3.79  | S  |
| 60:40                                  | 22    | 74.77  | 4.79  | PG |
| 50:50                                  | 21    | 80.36  | 6.00  | G  |
| 40:60                                  | 20    | 86.85  | 7.47  | G  |
| 30:70                                  | 19    | 94.48  | 9.28  | G  |
| 20:80                                  | 18    | 103.58 | 11.51 | G  |
| 10:90                                  | 17    | 114.62 | 14.32 | P  |
| 05:95                                  | 16.5  | 121.08 | 16.00 | P  |
| Ethanol:n-Octane (v/v)                 |       |        |       |    |
| 90:10                                  | 24.95 | 62.51  | 2.35  | S  |



|                              |       |        |       |    |
|------------------------------|-------|--------|-------|----|
| 80:20                        | 23.9  | 67.12  | 3.10  | S  |
| 70:30                        | 22.85 | 72.46  | 4.04  | PG |
| 60:40                        | 21.8  | 78.72  | 5.20  | PG |
| 50:50                        | 20.75 | 86.17  | 6.67  | G  |
| 40:60                        | 19.7  | 95.17  | 8.52  | G  |
| 30:70                        | 18.65 | 106.28 | 10.91 | G  |
| 20:80                        | 17.6  | 120.31 | 14.03 | G  |
| 10:90                        | 16.55 | 138.62 | 18.22 | P  |
| 05:95                        | 16.03 | 150.04 | 20.87 | P  |
| Ethanol:n-Hexane (v/v)       |       |        |       |    |
| 90:10                        | 24.89 | 61.94  | 2.36  | S  |
| 80:20                        | 23.78 | 65.81  | 3.11  | S  |
| 70:30                        | 22.67 | 70.20  | 4.03  | PG |
| 60:40                        | 21.56 | 75.21  | 5.16  | G  |
| 50:50                        | 20.45 | 81.00  | 6.54  | G  |
| 40:60                        | 19.34 | 87.74  | 8.24  | G  |
| 30:70                        | 18.23 | 95.72  | 10.35 | G  |
| 20:80                        | 17.12 | 105.29 | 12.98 | P  |
| 10:90                        | 16.01 | 116.98 | 16.31 | P  |
| 05:95                        | 15.46 | 123.86 | 18.31 | P  |
| Ethanol:Cyclohexane<br>(v/v) |       |        |       |    |

|                         |       |        |       |    |
|-------------------------|-------|--------|-------|----|
| 90:10                   | 25.08 | 61.33  | 2.24  | S  |
| 80:20                   | 24.16 | 64.45  | 2.83  | S  |
| 70:30                   | 23.24 | 67.91  | 3.54  | S  |
| 60:40                   | 22.32 | 71.76  | 4.37  | PG |
| 50:50                   | 21.4  | 76.06  | 5.35  | G  |
| 40:60                   | 20.48 | 80.92  | 6.51  | G  |
| 30:70                   | 19.56 | 86.45  | 7.89  | G  |
| 20:80                   | 18.64 | 92.78  | 9.53  | G  |
| 10:90                   | 17.72 | 100.11 | 11.51 | P  |
| 05:95                   | 17.26 | 104.23 | 12.64 | P  |
| Ethanol:n-Octanol (v/v) |       |        |       |    |
| 90:10                   | 25.51 | 62.43  | 2.08  | S  |
| 80:20                   | 25.02 | 66.92  | 2.48  | S  |
| 70:30                   | 24.53 | 72.11  | 2.95  | S  |
| 60:40                   | 24.04 | 78.17  | 3.52  | S  |
| 50:50                   | 23.55 | 85.34  | 4.20  | S  |
| 40:60                   | 23.06 | 93.96  | 5.05  | G  |
| 30:70                   | 22.57 | 104.53 | 6.10  | G  |
| 20:80                   | 22.08 | 117.76 | 7.45  | G  |
| 10:90                   | 21.59 | 134.84 | 9.21  | G  |
| Ethanol:Toluene (v/v)   |       |        |       |    |
| 90:10                   | 25.22 | 61.27  | 2.17  | S  |

|                                                                                  |       |       |      |    |
|----------------------------------------------------------------------------------|-------|-------|------|----|
| 80:20                                                                            | 24.44 | 64.32 | 2.68 | S  |
| 70:30                                                                            | 23.66 | 67.68 | 3.27 | S  |
| 60:40                                                                            | 22.88 | 71.42 | 3.96 | PG |
| 50:50                                                                            | 22.1  | 75.59 | 4.76 | G  |
| 40:60                                                                            | 21.32 | 80.29 | 5.71 | G  |
| 30:70                                                                            | 20.54 | 85.60 | 6.83 | G  |
| 20:80                                                                            | 19.76 | 91.66 | 8.14 | G  |
| 10:90                                                                            | 18.98 | 98.65 | 9.71 | G  |
| Ethanol:Ethyl acetate<br>(v/v)                                                   |       |       |      |    |
| 90:10                                                                            | 25.26 | 60.98 | 2.15 | S  |
| 70:30                                                                            | 23.78 | 66.62 | 3.15 | S  |
| 60:40                                                                            | 23.04 | 69.85 | 3.77 | S  |
| 50:50                                                                            | 22.3  | 73.40 | 4.48 | PG |
| 30:70                                                                            | 20.82 | 81.73 | 6.26 | G  |
| 20:80                                                                            | 20.08 | 86.65 | 7.37 | G  |
| 10:90                                                                            | 19.34 | 92.20 | 8.66 | G  |
| Concentration: 2% (w/v). S: solution, PG: partial gel, G: gel, P: precipitation. |       |       |      |    |

<sup>a</sup>One-component molar volume and solubility parameters are taken from reference 29.

The solubility parameter values of the mixed solvents were calculated using  $\delta = \sum \phi_i \delta_i$

(Equ. 68 of reference 29)

**Table S5 Summarizes of the Flory-Huggins parameter ( $\chi$ ) for various mixed solvents to verify the model.**

| Solvents                                  | $\delta$<br>( $\text{J}^{1/2}/\text{cm}^{3/2}$ ) | V<br>( $\text{cm}^3/\text{mol}$ ) | $\chi$ | Gelation<br>behaviour |
|-------------------------------------------|--------------------------------------------------|-----------------------------------|--------|-----------------------|
| Ethanol:Carbon tetrachloride<br>(v/v=9:1) | 25.16                                            | 60.92                             | 2.19   | S                     |
| Ethanol:Acetonitrile<br>(v/v=5:5)         | 25.15                                            | 55.39                             | 2.00   | S                     |
| Ethanol:Carbon tetrachloride<br>(v/v=3:7) | 20.12                                            | 81.06                             | 6.86   | G                     |
| Ethanol:Benzene (v/v=3:7)                 | 20.96                                            | 77.17                             | 5.79   | G                     |

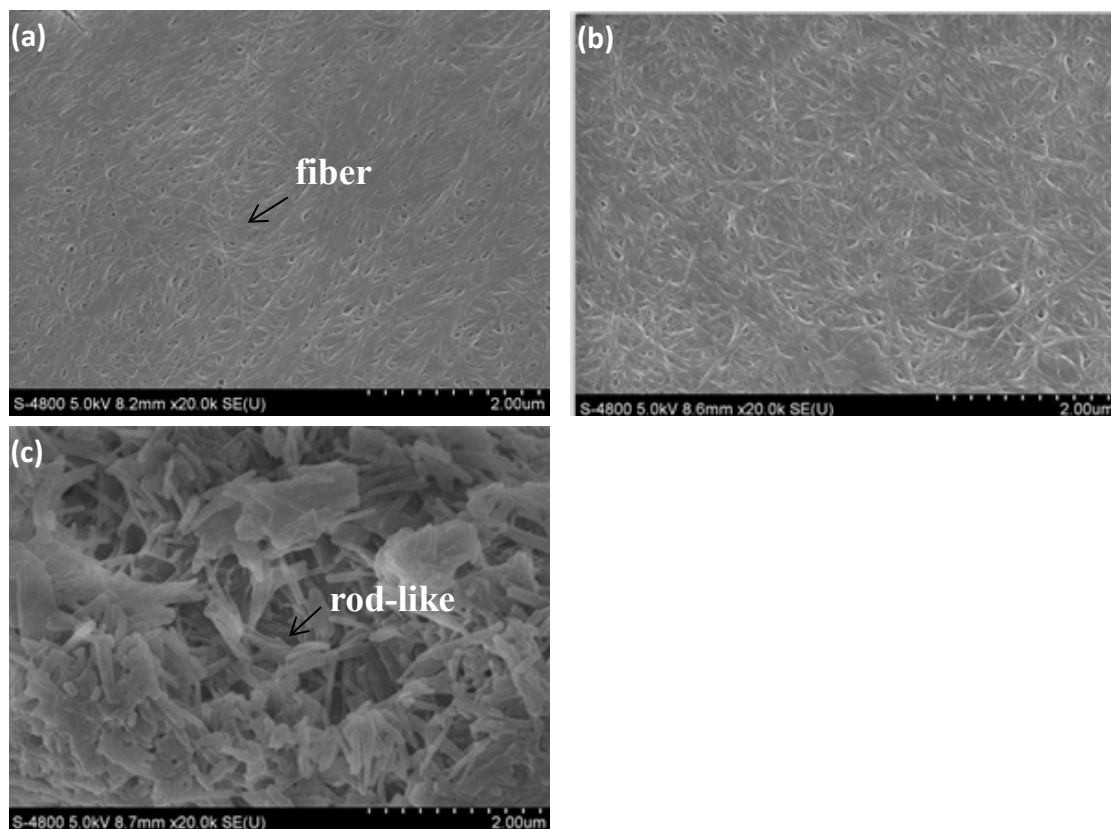

Fig. S1 SEM images of DCBS xerogels and precipitates (2% w/v) in different methylcyclohexane contents: (a) 70%; (b) 80%; (c) 100%.

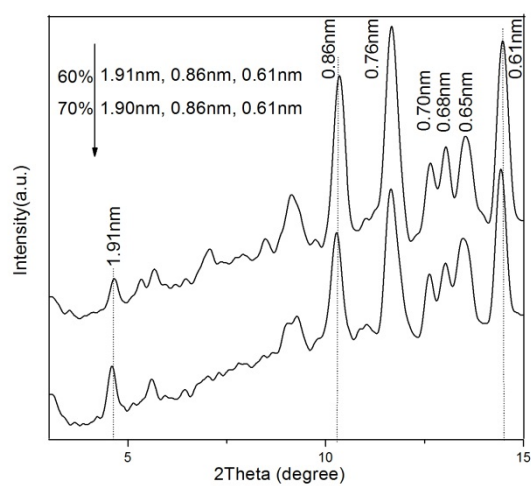

Fig. S2 XRD patterns of xerogels (2% w/v) at different methylcyclohexane contents: 60% and 70%.

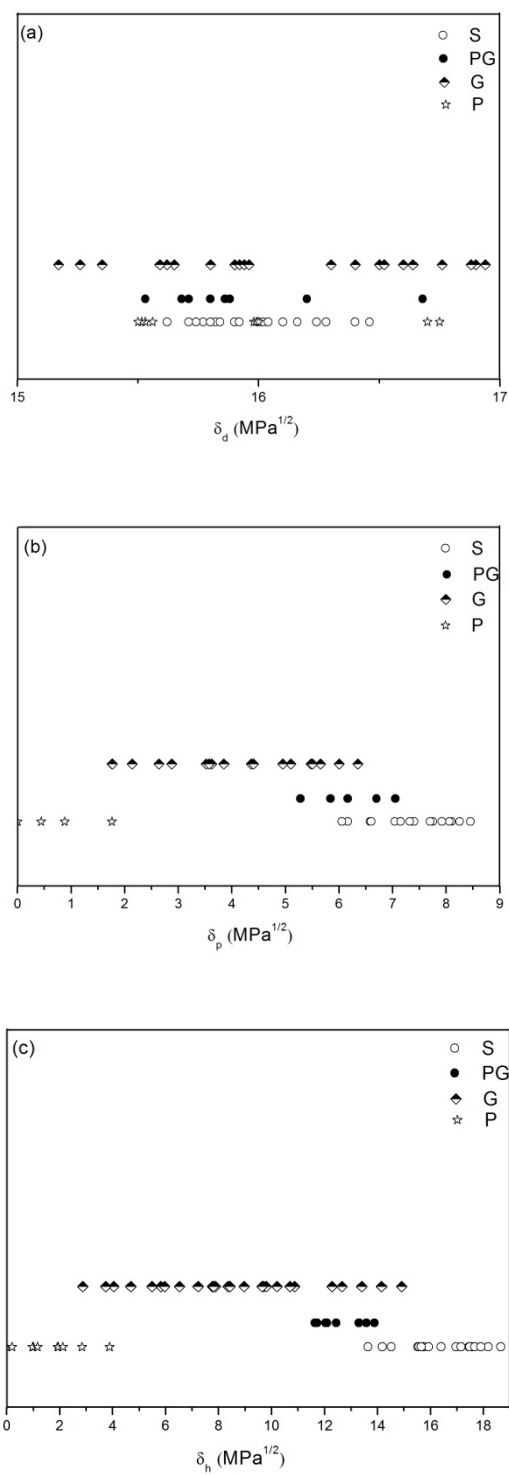

Fig. S3 Gelation behaviour of DCBS as a function of the Hansen parameters in the studied solvents: (a)  $\delta_d$ , (b)  $\delta_p$ , (c)  $\delta_h$ .
